# Supplementary material
Source: ML conference proceedings conference paper supplement (https://openreview.net/forum?id=IqHi5EYn8F)

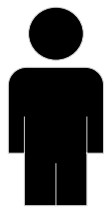

Agent 1

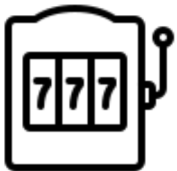

Arm a

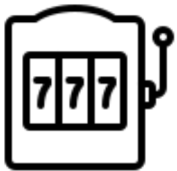

Arm b

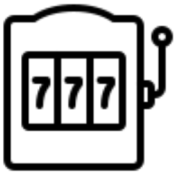

Arm c

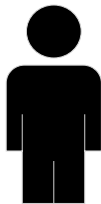

Agent 2

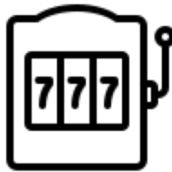

Arm d

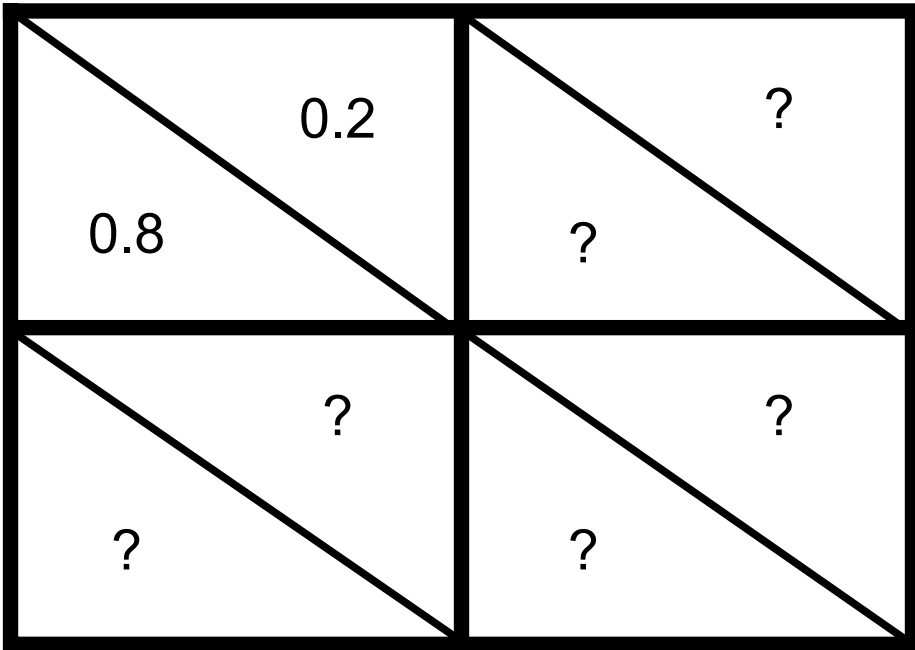

Supplement: supplementary_material [file attachment]

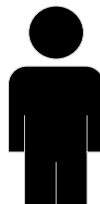

Agent 2

Arm c

Arm d

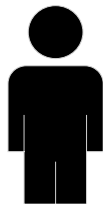

Agent 1

Arm a

Arm b

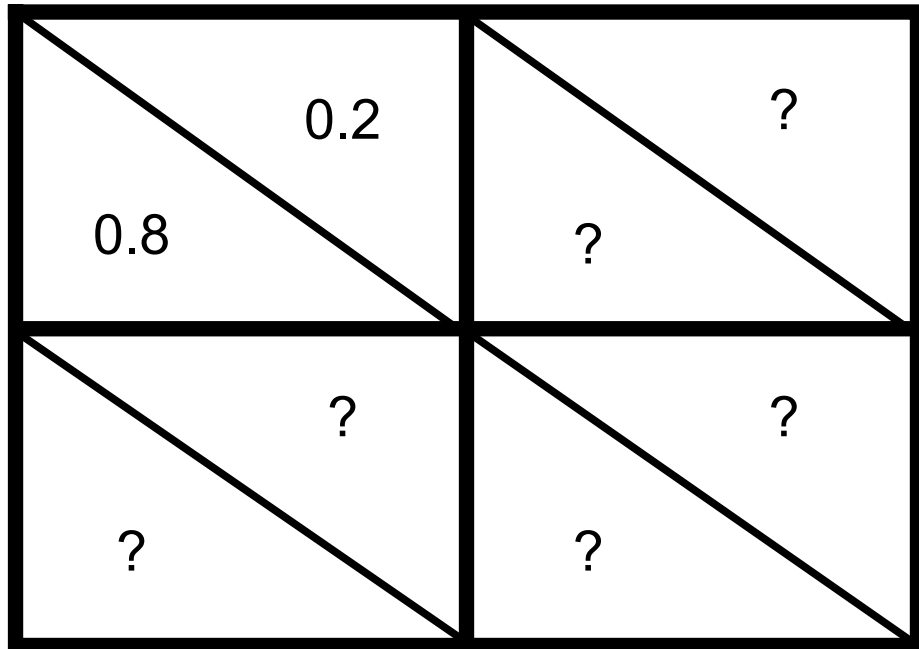

Supplement: supplementary_material [file attachment]
